# Supplementary material for: Au-TiO2Nanocomposites and Efficient Photocatalytic Hydrogen Production under UV-Visible and Visible Light Illuminations: A Comparison of Different Crystalline Forms of TiO2
Source: Hindawi journal article supplement (doi:10.1155/2013/685614), 2013-01-01

## Supporting Information

### **Au-TiO<sub>2</sub> Nanocomposites and Efficient Photocatalytic Hydrogen Production under UV-visible and Visible Light Illuminations. Comparison of Different Crystalline Forms of TiO<sub>2</sub>**

Deepa Jose,<sup>†</sup> Christopher M. Sorensen,<sup>‡</sup> Sadhana S. Rayalu,<sup>†,§</sup> Khadga M. Shrestha,<sup>†</sup> Kenneth J. Klabunde<sup>†,\*</sup>

*Department of Chemistry<sup>†</sup> and Department of Physics<sup>‡</sup>, Kansas State University, Manhattan, Kansas 66506, United States*

*<sup>§</sup>Environmental Materials Division, National Environmental Engineering Research Institute (CSIR-NEERI), Nehru Marg, Nagpur, 440020, Maharashtra, India*

**Figure S1.** N<sub>2</sub> adsorption/desorption isotherms of (a) P25, (b) Au/P25, (c) Anatase commercial, (d) Au/anatase commercial, (e) Anatase aerogel, (f) Au/anatase aerogel

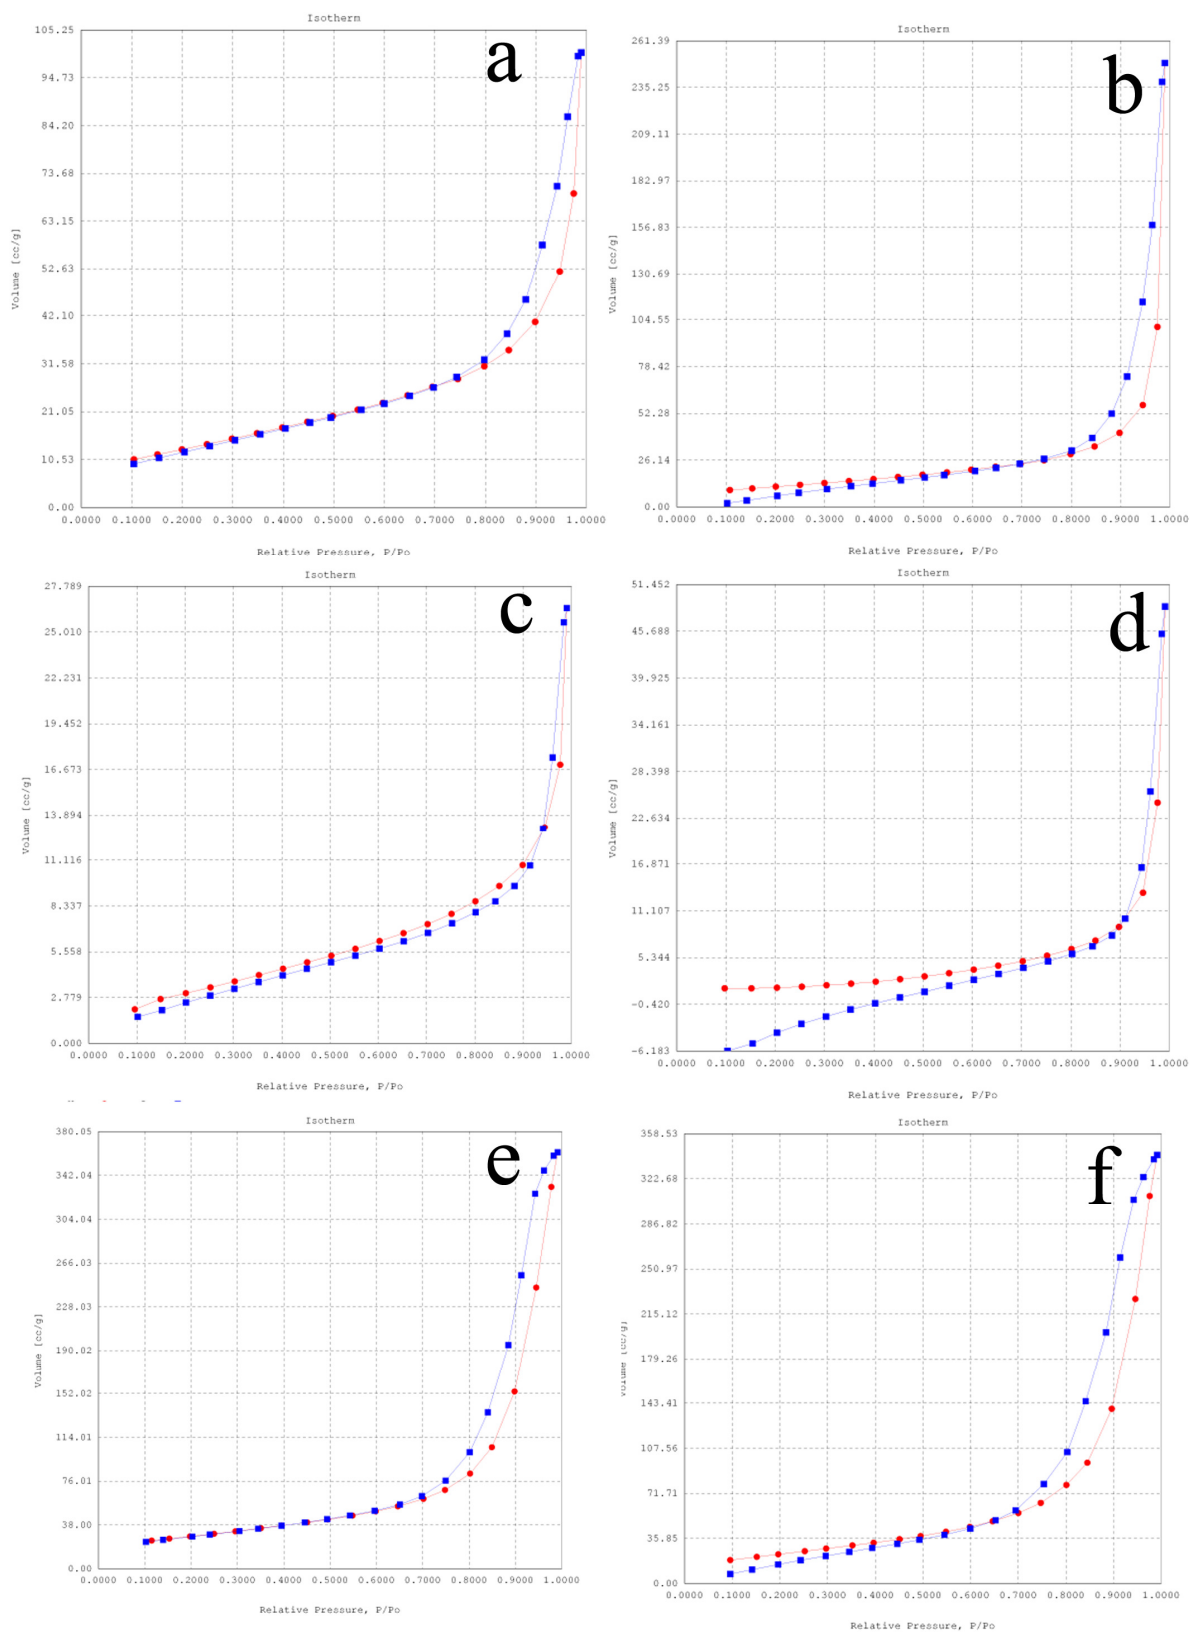

**Figure S2.** N<sub>2</sub> adsorption/desorption isotherms of (a) Rutile, (b) Au/rutile

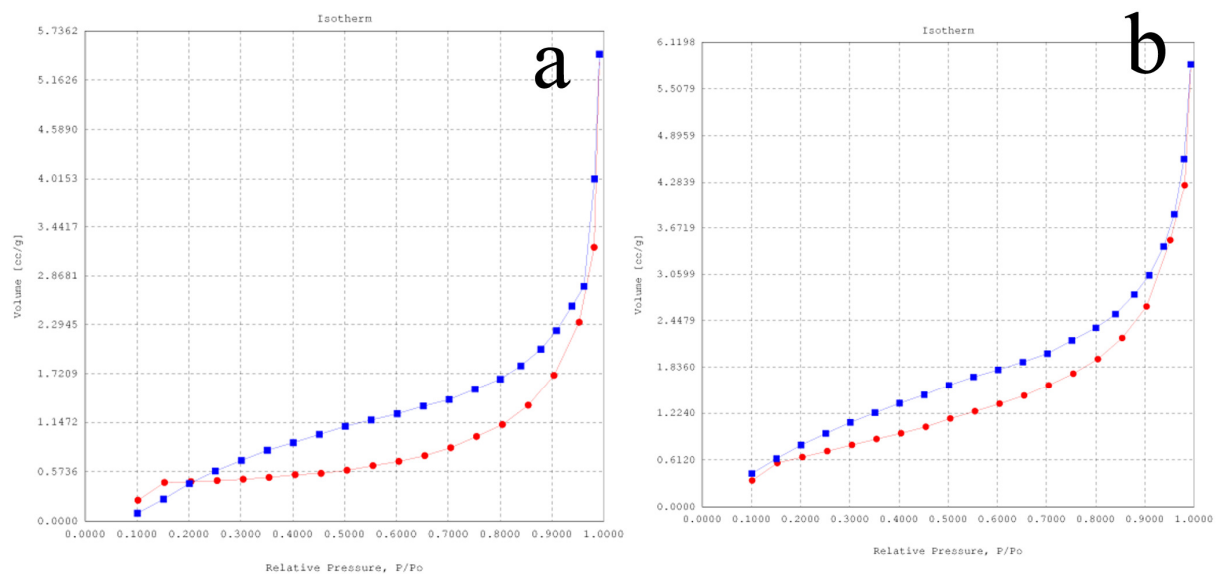

**Table S1.** BET surface area analysis details of TiO<sub>2</sub>, and Au/TiO<sub>2</sub> samples

| Catalyst              | Surface area        | Pore size | Pore volume |
|-----------------------|---------------------|-----------|-------------|
|                       | (m <sup>2</sup> /g) | (Å)       | (cc/g)      |
| P25                   | 48                  | 24        | 0.15        |
| Au/P25                | 42                  | 24        | 0.38        |
| Anatase commercial    | 13                  | 16        | 0.04        |
| Au/anatase commercial | 5.6                 | 43        | 0.07        |
| Anatase aerogel       | 102                 | 171       | 0.56        |
| Au/anatase aerogel    | 89                  | 167       | 0.53        |
| Rutile                | 1.7                 | 17        | 0.01        |
| Au/rutile             | 3.2                 | 16        | 0.001       |

**Table S2.** Amount of Au loading in various photocatalysts prepared by the SMAD method

| Catalyst              | Au loading (wt %) |
|-----------------------|-------------------|
| Au/P25                | 1.0               |
| Au/anatase commercial | 1.5               |
| Au/anatase aerogel    | 1.2               |
| Au/rutile             | 1.5               |

**Figure S3.** Powder XRD pattern of (a) Au/P25, (b) Au/anatase commercial, (c) Au/anatase aerogel, and (d) Au/rutile [Red: Au (JCPDS # 04-784), blue: anatase (JCPDS # 21-1272), and green: rutile (21-1276) reflections]

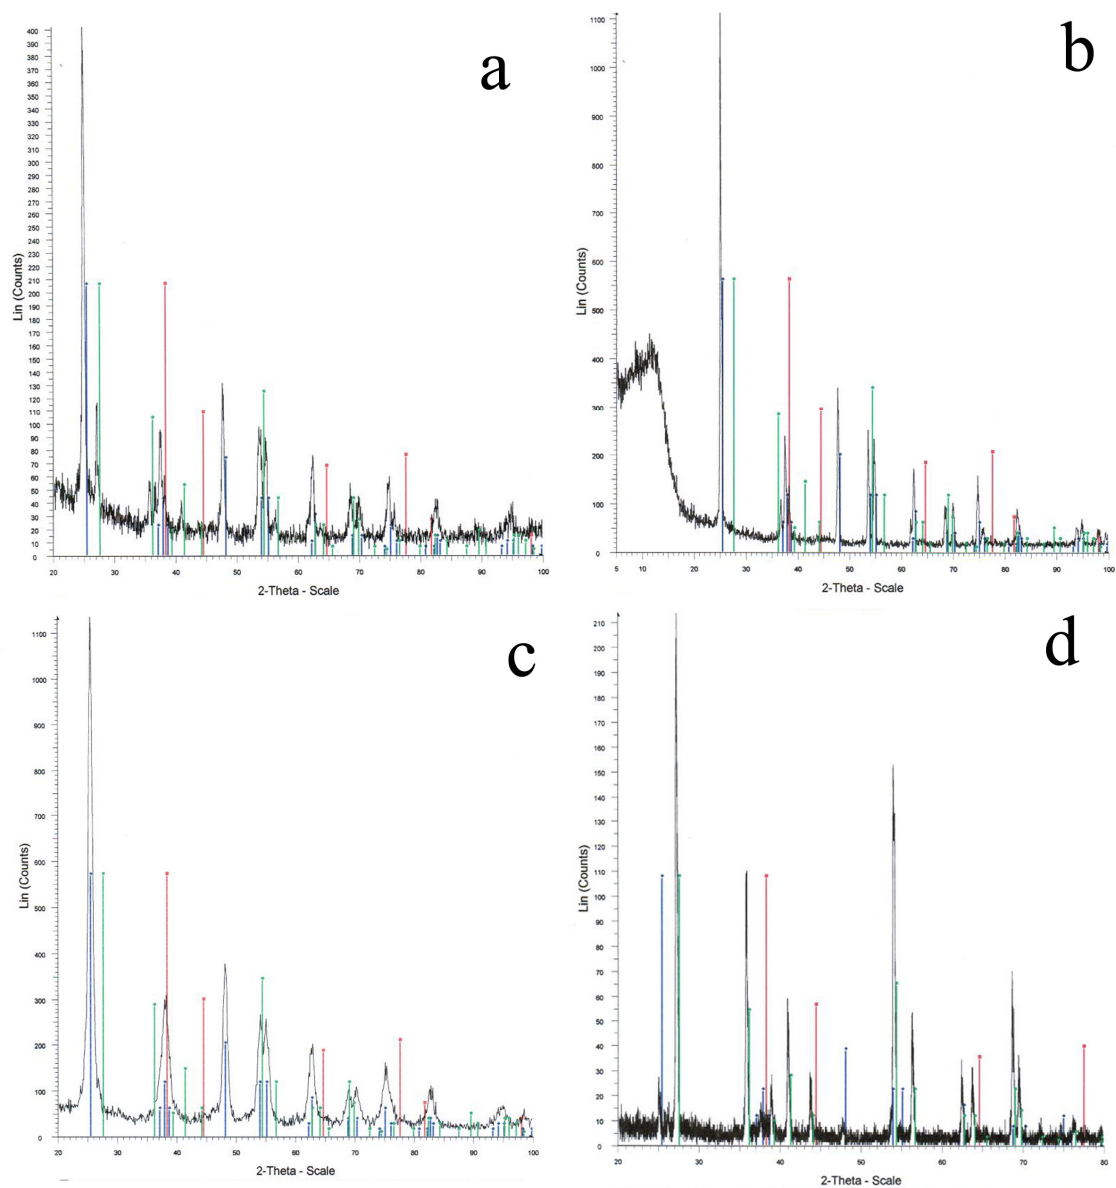

**Figure S4.** UV-visible spectrum of 2M  $\text{NaNO}_2$

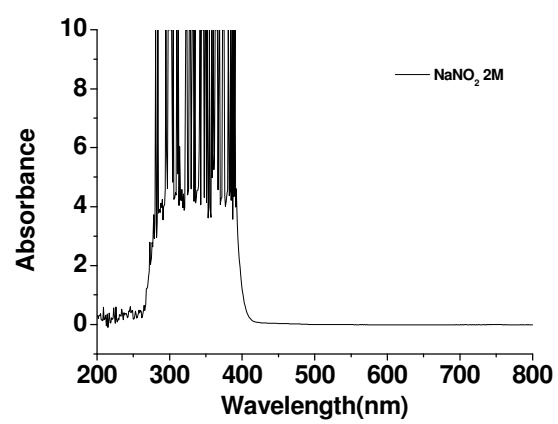

Supplement: f1 [file 685614.f1.pdf]
